# Supplementary material for: AcuM and AcuK: The global regulators controlling multiple cellular metabolisms in a dimorphic fungus Talaromyces marneffei
Source: PubMed Central journal article supplement (PMC11373862; doi:10.1371/journal.pntd.0012145), 2024-09-04
Supplement: pntd.0012145.s003.pdf [file pntd.0012145.s003.pdf]

**Table S3. Validation of transcriptomic data by qRT-PCR for selected genes.** *T. marneffei* ATCC18224,  $\Delta acuK\Delta$ , and  $\Delta acuM$  strains were cultivated under normal growth conditions (ANM broth) at 25°C for 36 hours. RNA samples were extracted, and qRT-PCR were conducted as described in materials and methods.

| Mutant        | Gene        | Fold-change WT/mut |         |
|---------------|-------------|--------------------|---------|
|               |             | RNA-Seq            | qRT-PCR |
| $\Delta acuK$ | <i>cytC</i> | 0.10               | 0.46    |
|               | <i>alxA</i> | 0.39               | 1.19    |
|               | <i>fetC</i> | 3.16               | 3.47    |
|               | <i>sidA</i> | 0.98               | 2.43    |
|               | <i>sidF</i> | 1771.70            | 2.55    |
| $\Delta acuM$ | <i>cytC</i> | 0.12               | 0.60    |
|               | <i>alxA</i> | 0.45               | 1.10    |
|               | <i>fetC</i> | 3.72               | 0.73    |
|               | <i>sidA</i> | 1.01               | 0.98    |
|               | <i>sidF</i> | 1303.34            | 0.40    |
